# Supplementary material for: New α-pyrones from an endophytic fungus, Hypoxylon investiens J2
Source: Royal Society of Chemistry journal article supplement (doi:10.1039/c9ra05308e), 2019-01-01
Supplement: c9ra05308e1.pdf [file c9ra05308e1.pdf]

## Electronic Supplementary Information (ESI)

### New $\alpha$ -Pyrones from an Endophytic Fungus, *Hypoxylon investiens* J2

Chao Yuan,<sup>a</sup> Hong-Xia Yang,<sup>b</sup> Yu-Hua Guo,<sup>c</sup> Lin Fan,<sup>d</sup> Ying-Bo Zhang,<sup>a</sup> Gang Li<sup>b,\*</sup>

<sup>a</sup>Tropical Crops Genetic Resources Institute, Chinese Academy of Tropical Agricultural Sciences CATAS, Haikou 571101, People's Republic of China.

<sup>b</sup>Department of Natural Medicinal Chemistry and Pharmacognosy, School of Pharmacy, Qingdao University, Qingdao 266021, People's Republic of China.

<sup>c</sup>Shandong Drug and Food Vocational College, Weihai, Shandong 264210, People's Republic of China.

<sup>d</sup>Weihai Vocational College, Weihai 264210, People's Republic of China.

\*Corresponding Author:

Tel: +86-532-82991172; E-mail: gang.li@qdu.edu.cn

| <b>Table of Contents</b>                                                                                 | <b>Pages</b> |
|----------------------------------------------------------------------------------------------------------|--------------|
| <b>Figure S1.</b> $^1\text{H}$ NMR spectrum of compound <b>1</b> (500 MHz, $\text{CD}_3\text{OD}$ ).     | <b>3</b>     |
| <b>Figure S2.</b> $^{13}\text{C}$ NMR spectrum of compound <b>1</b> (125 MHz, $\text{CD}_3\text{OD}$ ).  | <b>4</b>     |
| <b>Figure S3.</b> HSQC spectrum of compound <b>1</b> (500 MHz, $\text{CD}_3\text{OD}$ ).                 | <b>5</b>     |
| <b>Figure S4.</b> HMBC spectrum of compound <b>1</b> (500 MHz, $\text{CD}_3\text{OD}$ ).                 | <b>6</b>     |
| <b>Figure S5.</b> NOSEY spectrum of compound <b>1</b> (500 MHz, $\text{CD}_3\text{OD}$ ).                | <b>7</b>     |
| <b>Figure S6.</b> Positive ESI-HRMS spectrum of compound <b>1</b> .                                      | <b>8</b>     |
| <br>                                                                                                     |              |
| <b>Figure S7.</b> $^1\text{H}$ NMR spectrum of compound <b>2</b> (500 MHz, $\text{CD}_3\text{OD}$ ).     | <b>9</b>     |
| <b>Figure S8.</b> $^{13}\text{C}$ NMR spectrum of compound <b>2</b> (125 MHz, $\text{CD}_3\text{OD}$ ).  | <b>10</b>    |
| <b>Figure S9.</b> HSQC spectrum of compound <b>2</b> (500 MHz, $\text{CD}_3\text{OD}$ ).                 | <b>11</b>    |
| <b>Figure S10.</b> HMBC spectrum of compound <b>2</b> (500 MHz, $\text{CD}_3\text{OD}$ ).                | <b>12</b>    |
| <b>Figure S11.</b> Positive ESI-HRMS spectrum of compound <b>2</b> .                                     | <b>13</b>    |
| <br>                                                                                                     |              |
| <b>Figure S12.</b> $^1\text{H}$ NMR spectrum of compound <b>3</b> (500 MHz, $\text{CD}_3\text{OD}$ ).    | <b>14</b>    |
| <b>Figure S13.</b> $^{13}\text{C}$ NMR spectrum of compound <b>3</b> (125 MHz, $\text{CD}_3\text{OD}$ ). | <b>15</b>    |
| <b>Figure S14.</b> HSQC spectrum of compound <b>3</b> (500 MHz, $\text{CD}_3\text{OD}$ ).                | <b>16</b>    |
| <b>Figure S15.</b> HMBC spectrum of compound <b>3</b> (500 MHz, $\text{CD}_3\text{OD}$ ).                | <b>17</b>    |
| <b>Figure S16.</b> Positive ESI-HRMS spectrum of compound <b>3</b> .                                     | <b>18</b>    |
| <br>                                                                                                     |              |
| <b>Figure S17.</b> $^1\text{H}$ NMR spectrum of compound <b>4</b> (500 MHz, $\text{CD}_3\text{OD}$ ).    | <b>19</b>    |
| <b>Figure S18.</b> $^{13}\text{C}$ NMR spectrum of compound <b>4</b> (125 MHz, $\text{CD}_3\text{OD}$ ). | <b>20</b>    |
| <b>Figure S19.</b> HSQC spectrum of compound <b>4</b> (500 MHz, $\text{CD}_3\text{OD}$ ).                | <b>21</b>    |
| <b>Figure S20.</b> HMBC spectrum of compound <b>4</b> (500 MHz, $\text{CD}_3\text{OD}$ ).                | <b>22</b>    |
| <b>Figure S21.</b> Positive ESI-HRMS spectrum of compound <b>4</b> .                                     | <b>23</b>    |

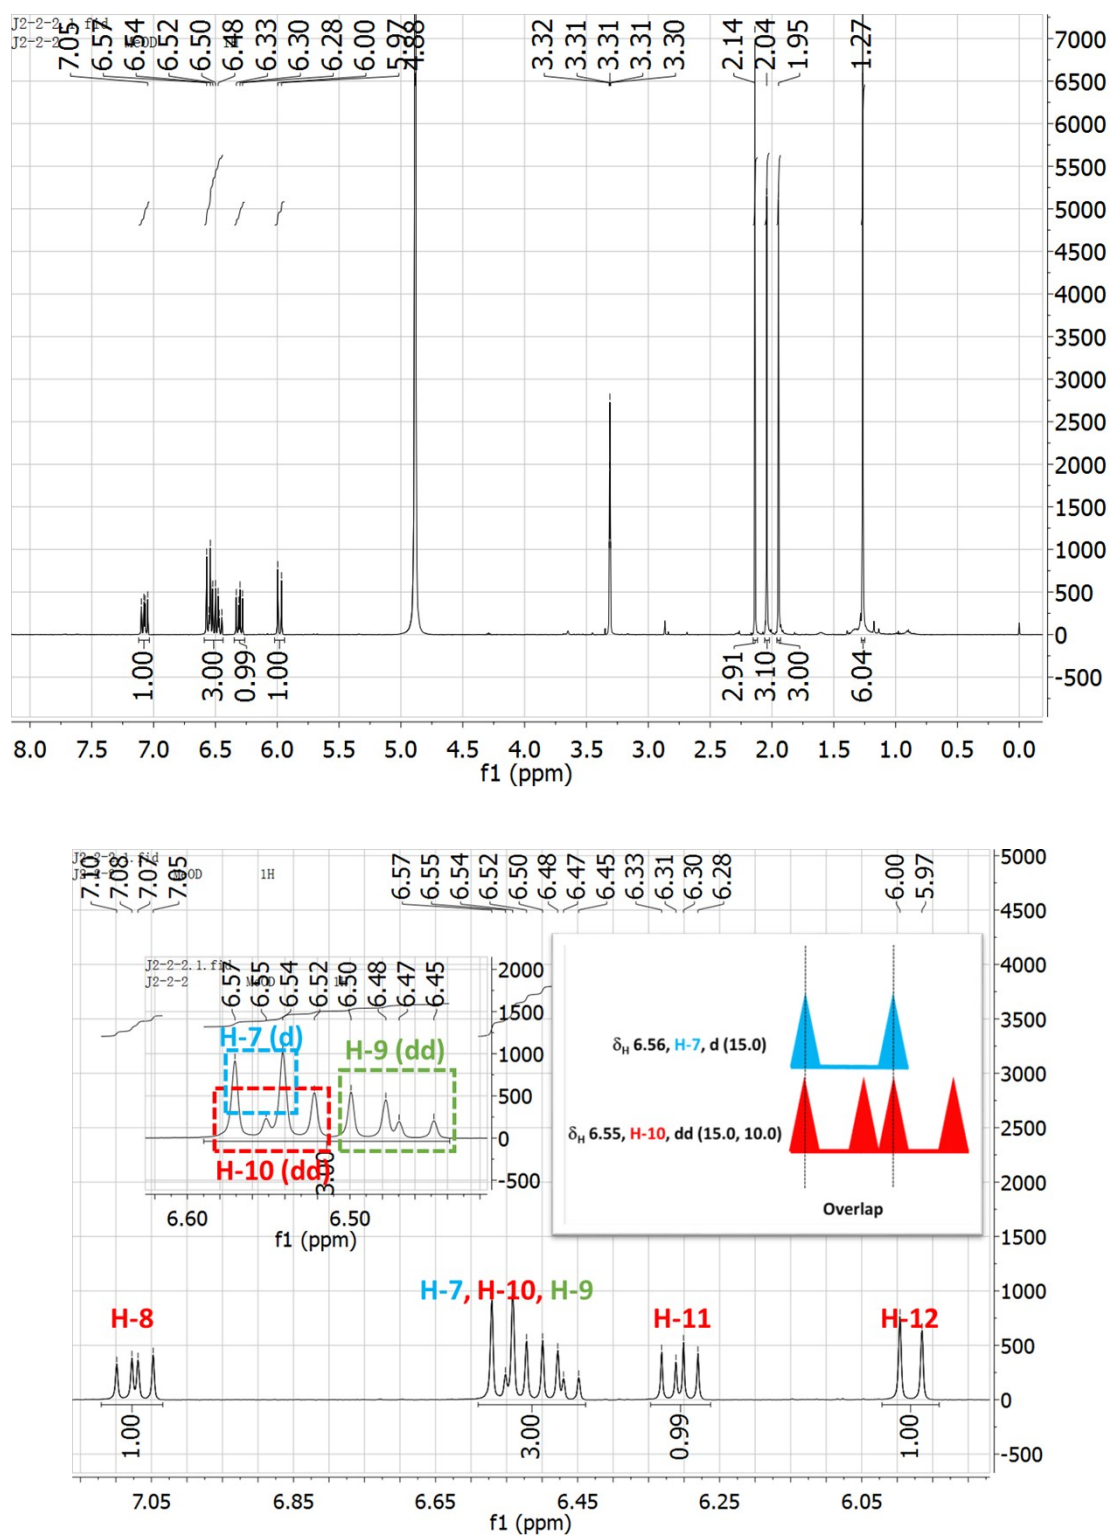

**Figure S1.**  $^1\text{H}$  NMR spectrum of compound **1** (500 MHz,  $\text{CD}_3\text{OD}$ ).

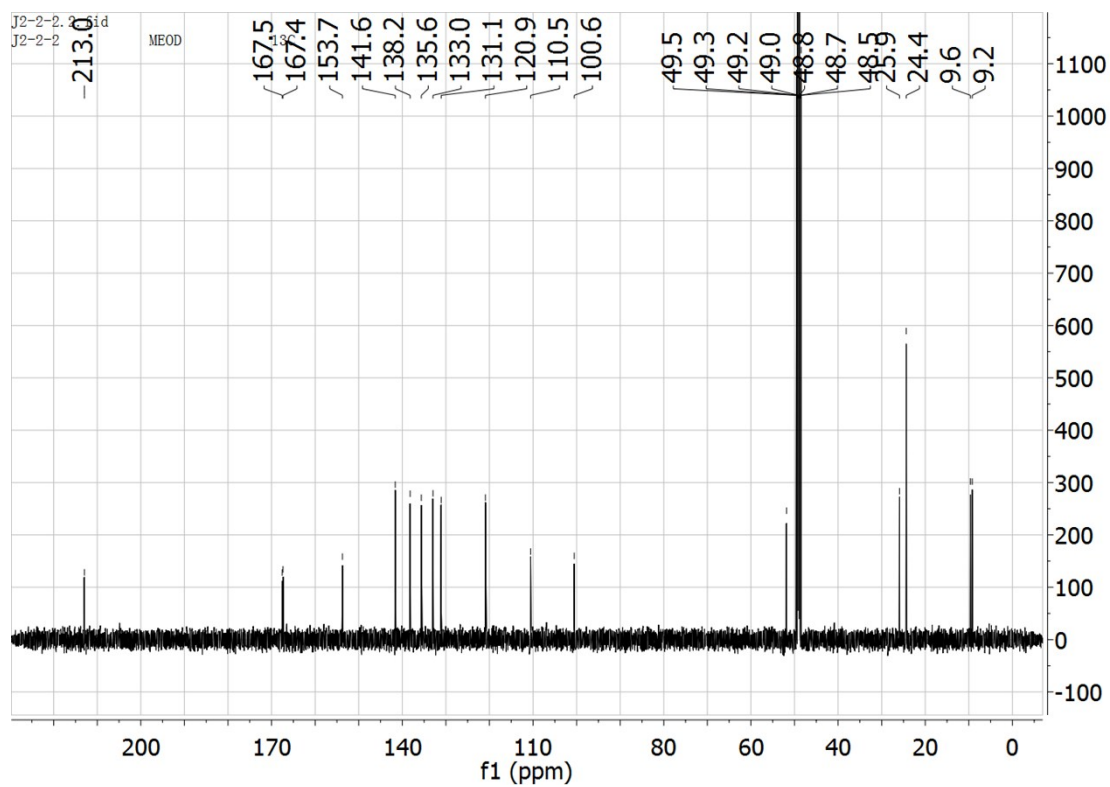

**Figure S2.** <sup>13</sup>C NMR spectrum of compound **1** (125 MHz, CD<sub>3</sub>OD).

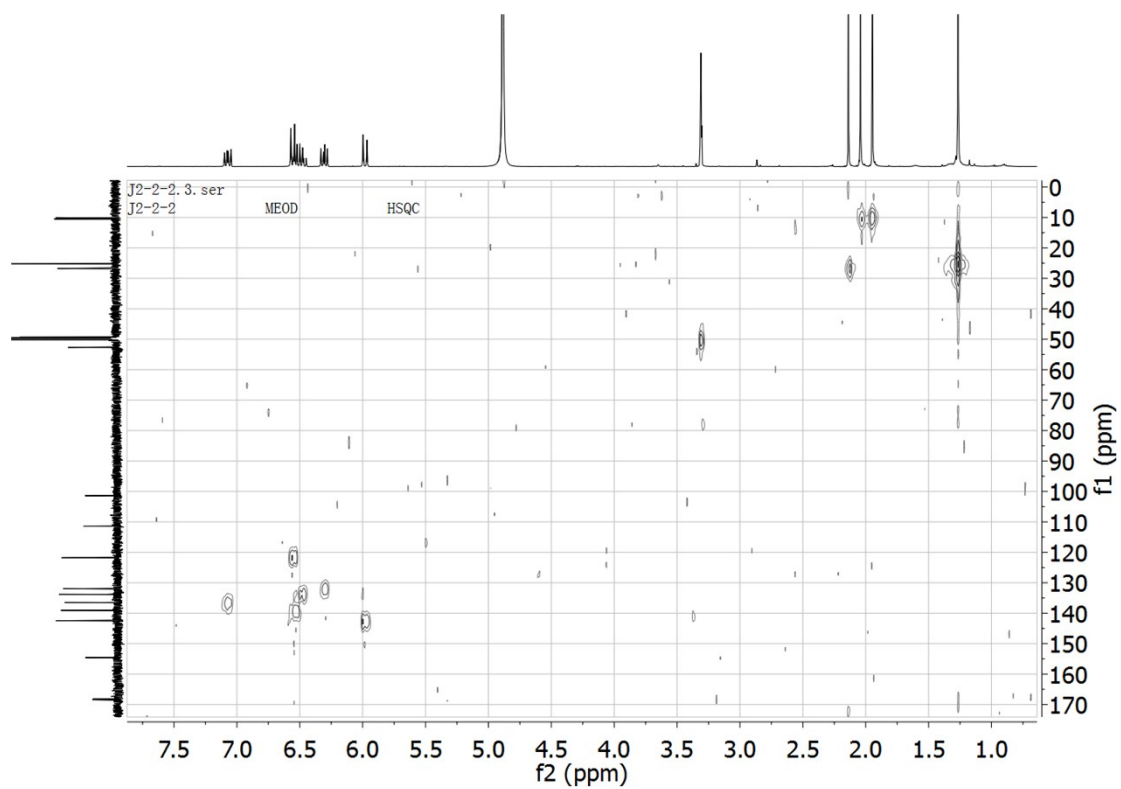

**Figure S3.** HSQC spectrum of compound **1** (500 MHz, CD<sub>3</sub>OD).

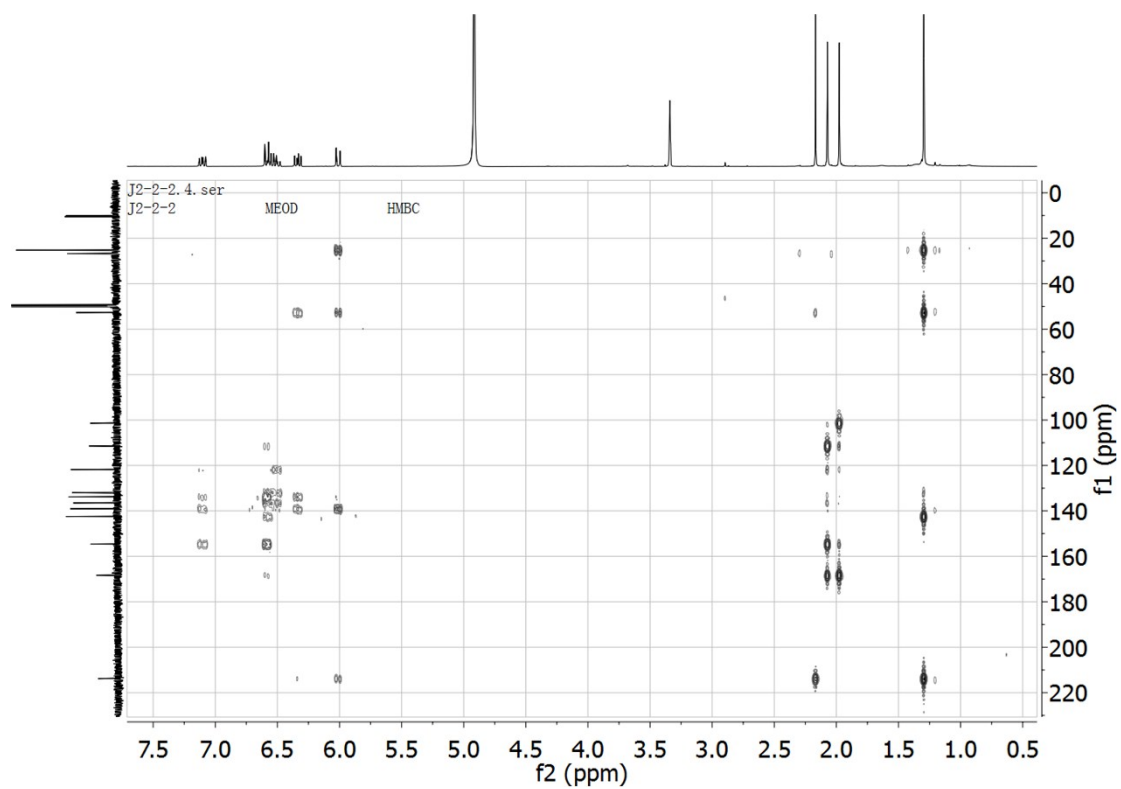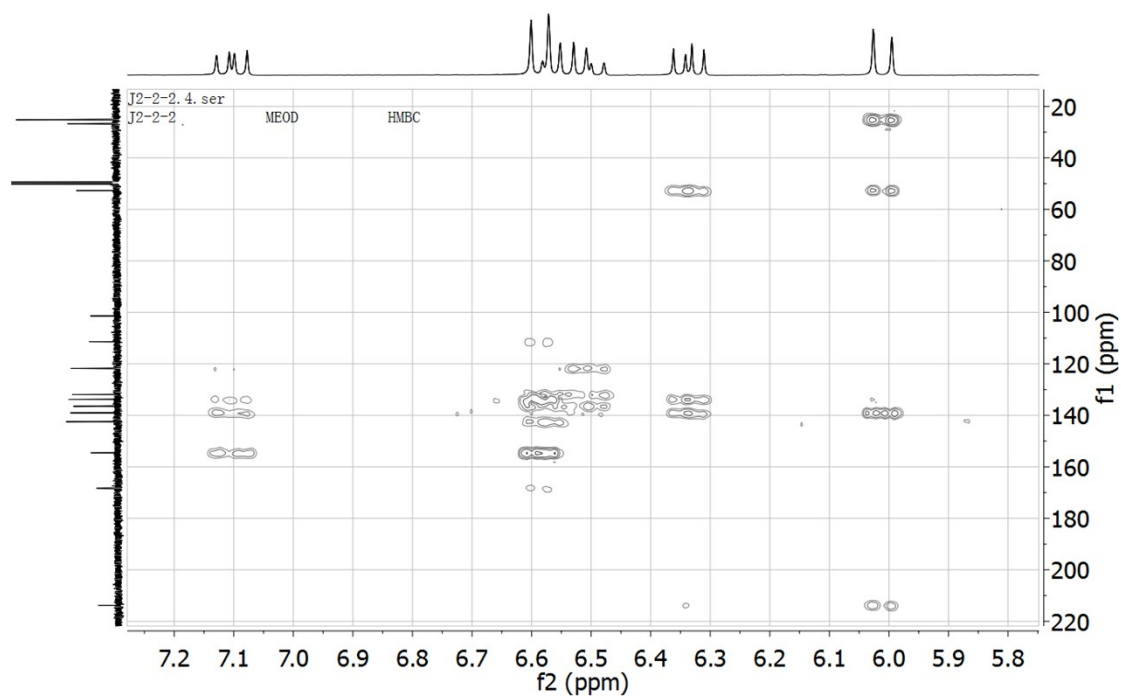

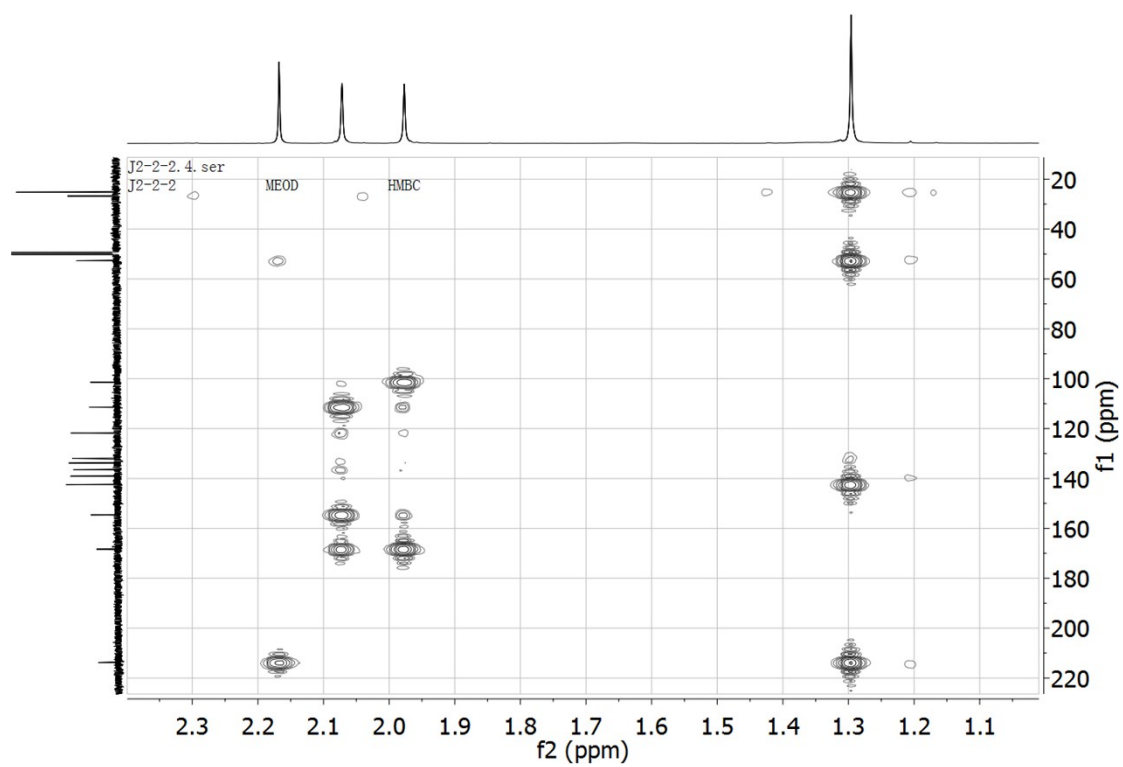

**Figure S4.** HMBC spectrum of compound **1** (500 MHz, CD<sub>3</sub>OD).

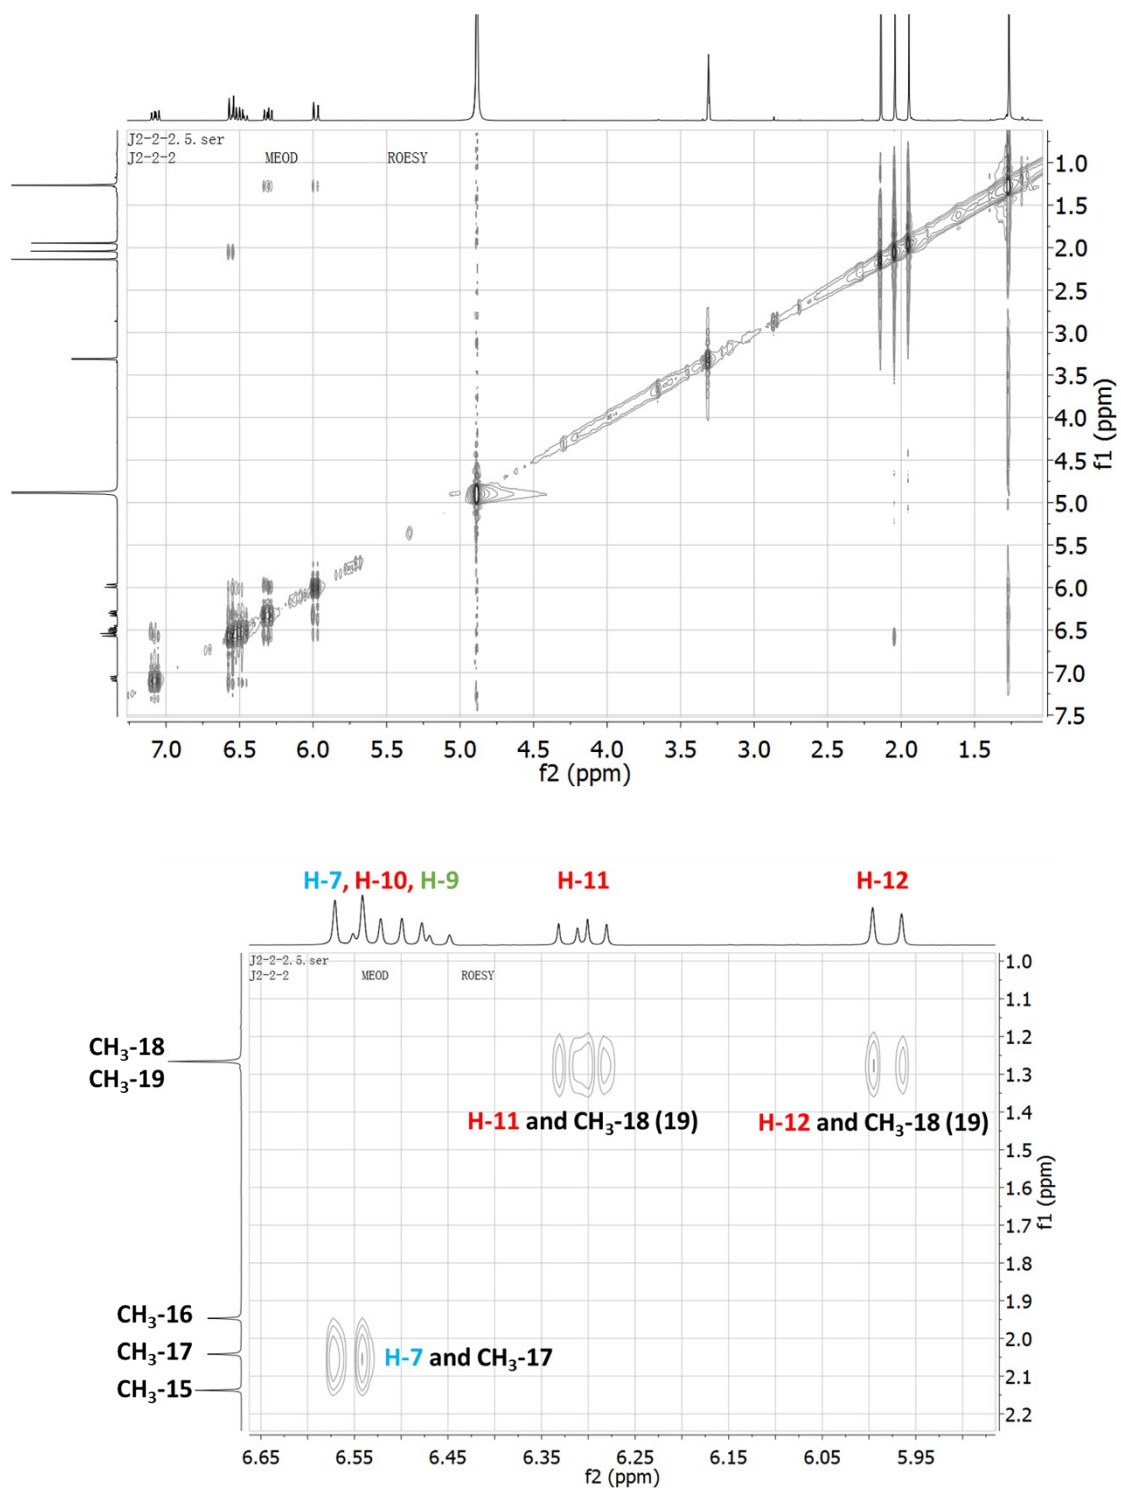

**Figure S5.** NOSEY spectrum of compound **1** (500 MHz, CD<sub>3</sub>OD).



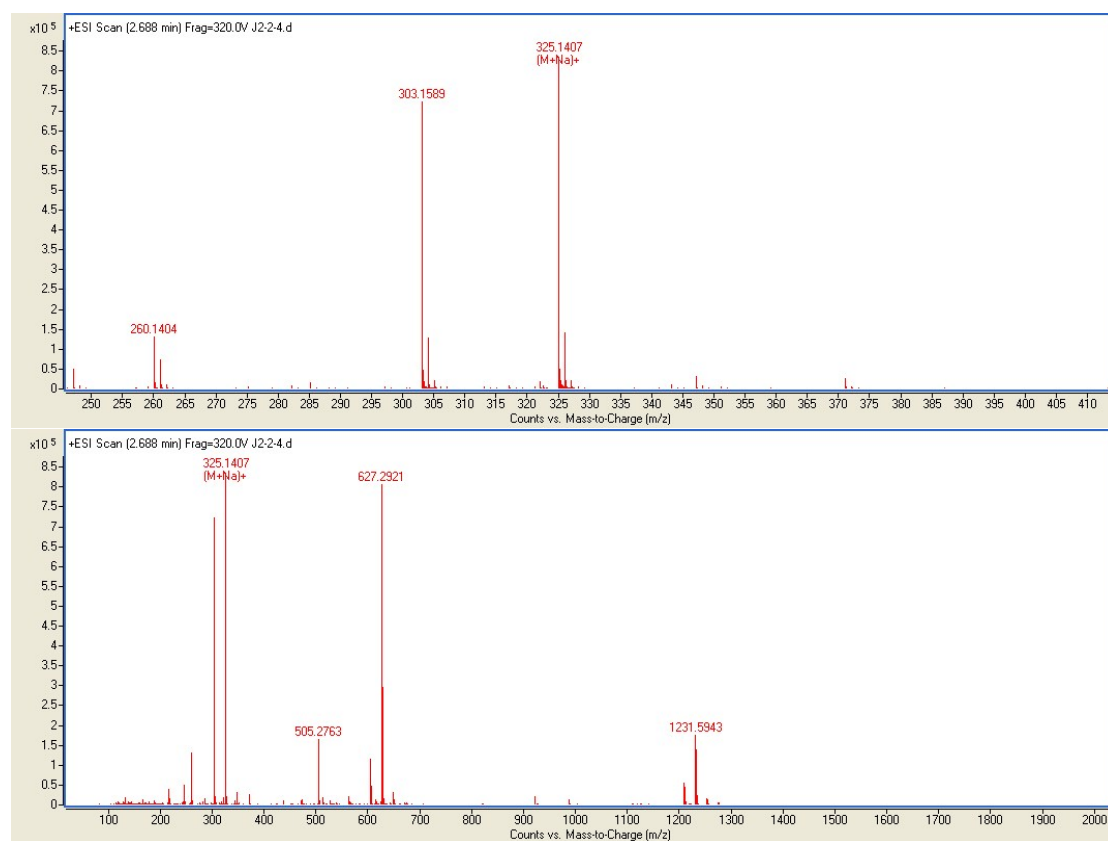

**Figure S6.** Positive ESI-HRMS spectrum of compound **1**.

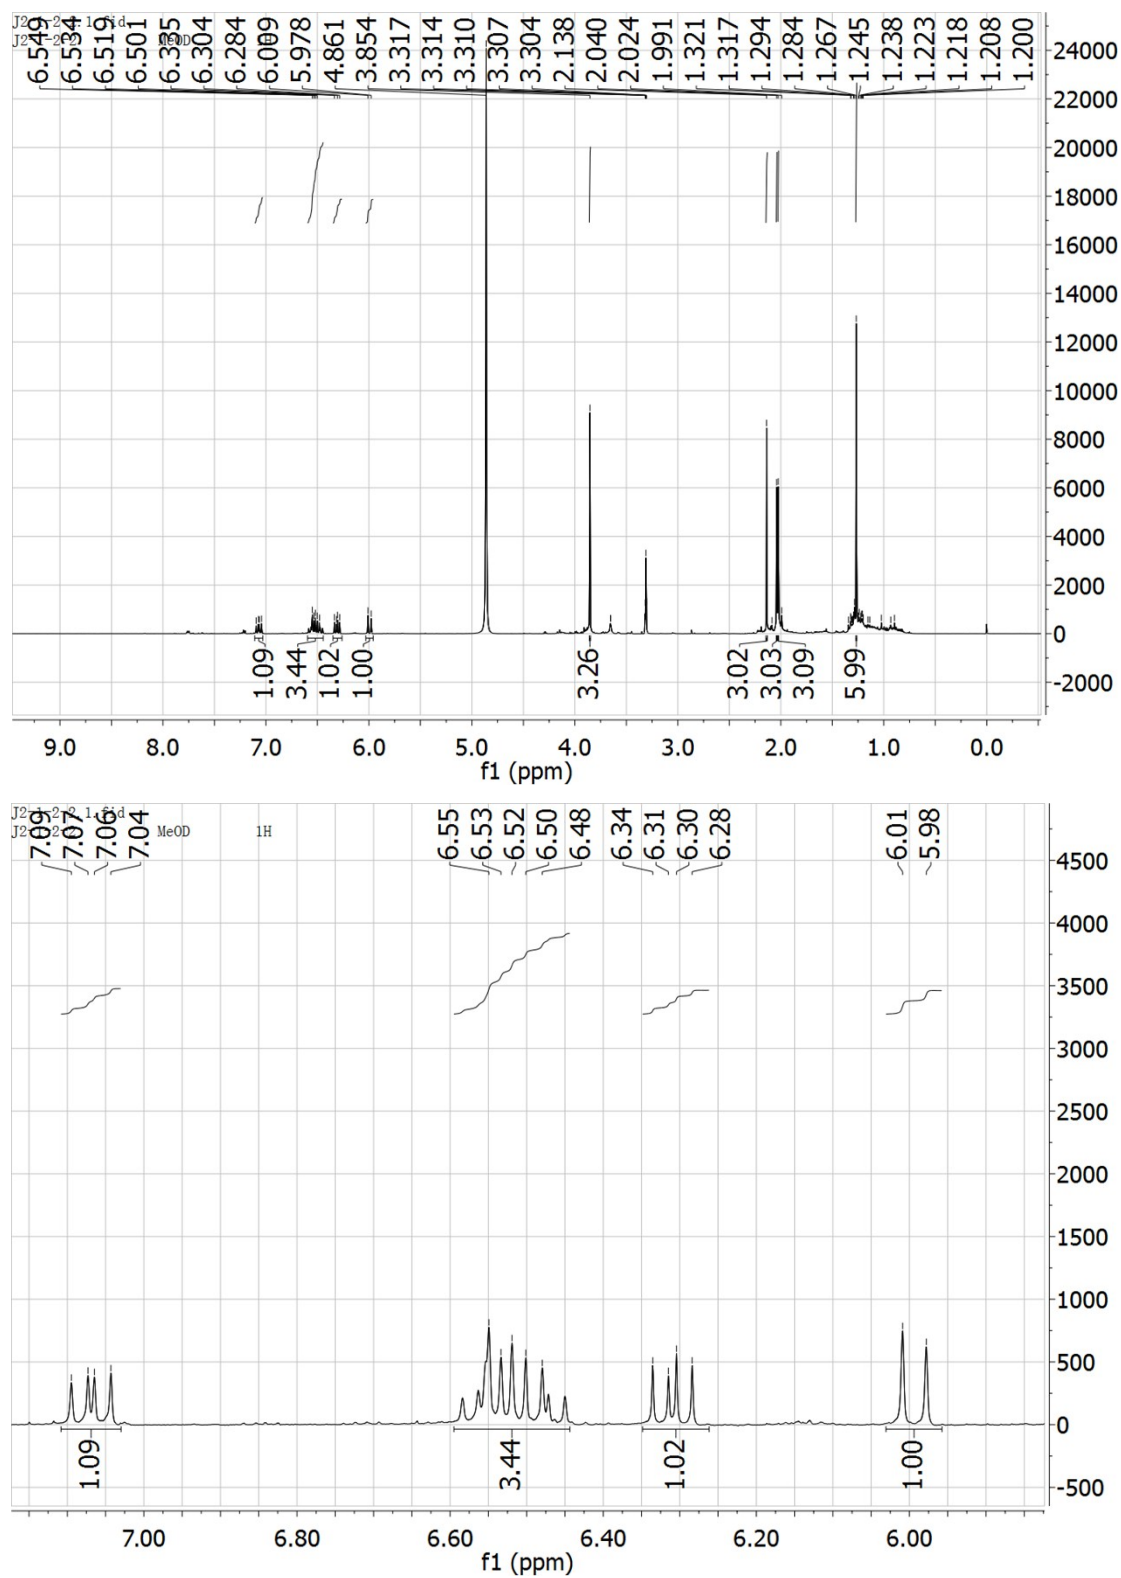

**Figure S7.**  $^1\text{H}$  NMR spectrum of compound **2** (500 MHz,  $\text{CD}_3\text{OD}$ ).

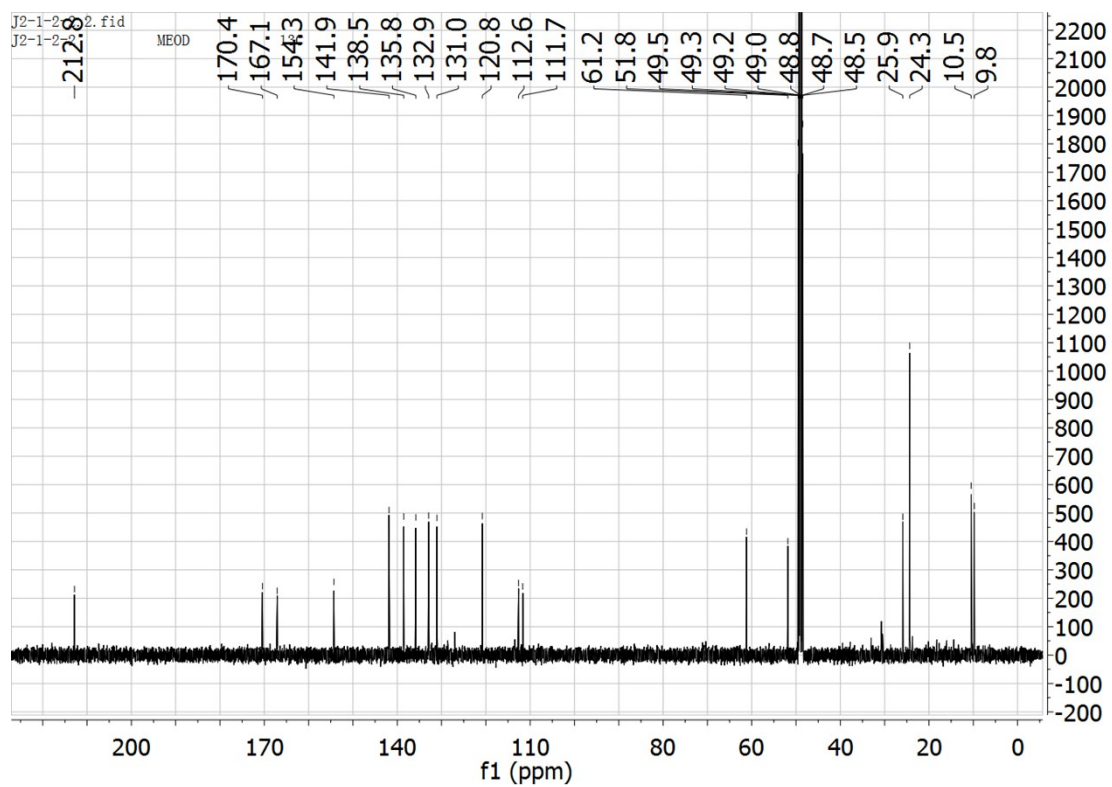

**Figure S8.** <sup>13</sup>C NMR spectrum of compound **2** (125 MHz, CD<sub>3</sub>OD).

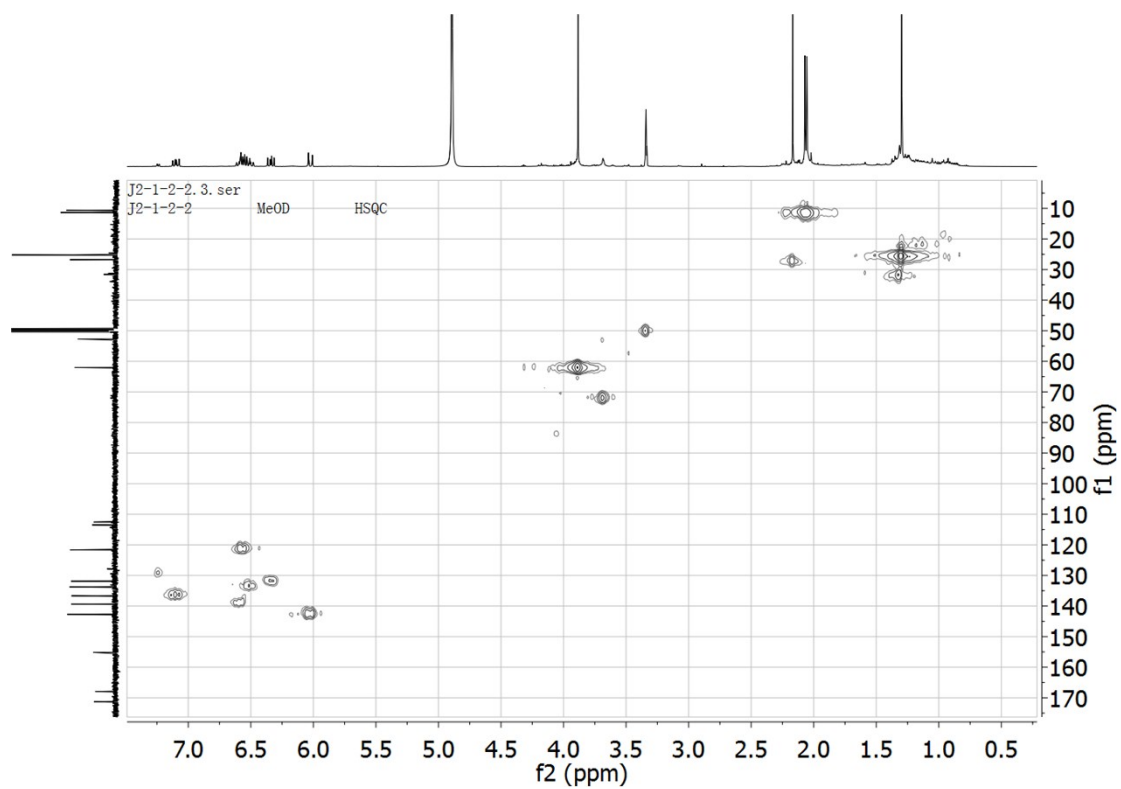

**Figure S9.** HSQC spectrum of compound **2** (500 MHz, CD<sub>3</sub>OD).

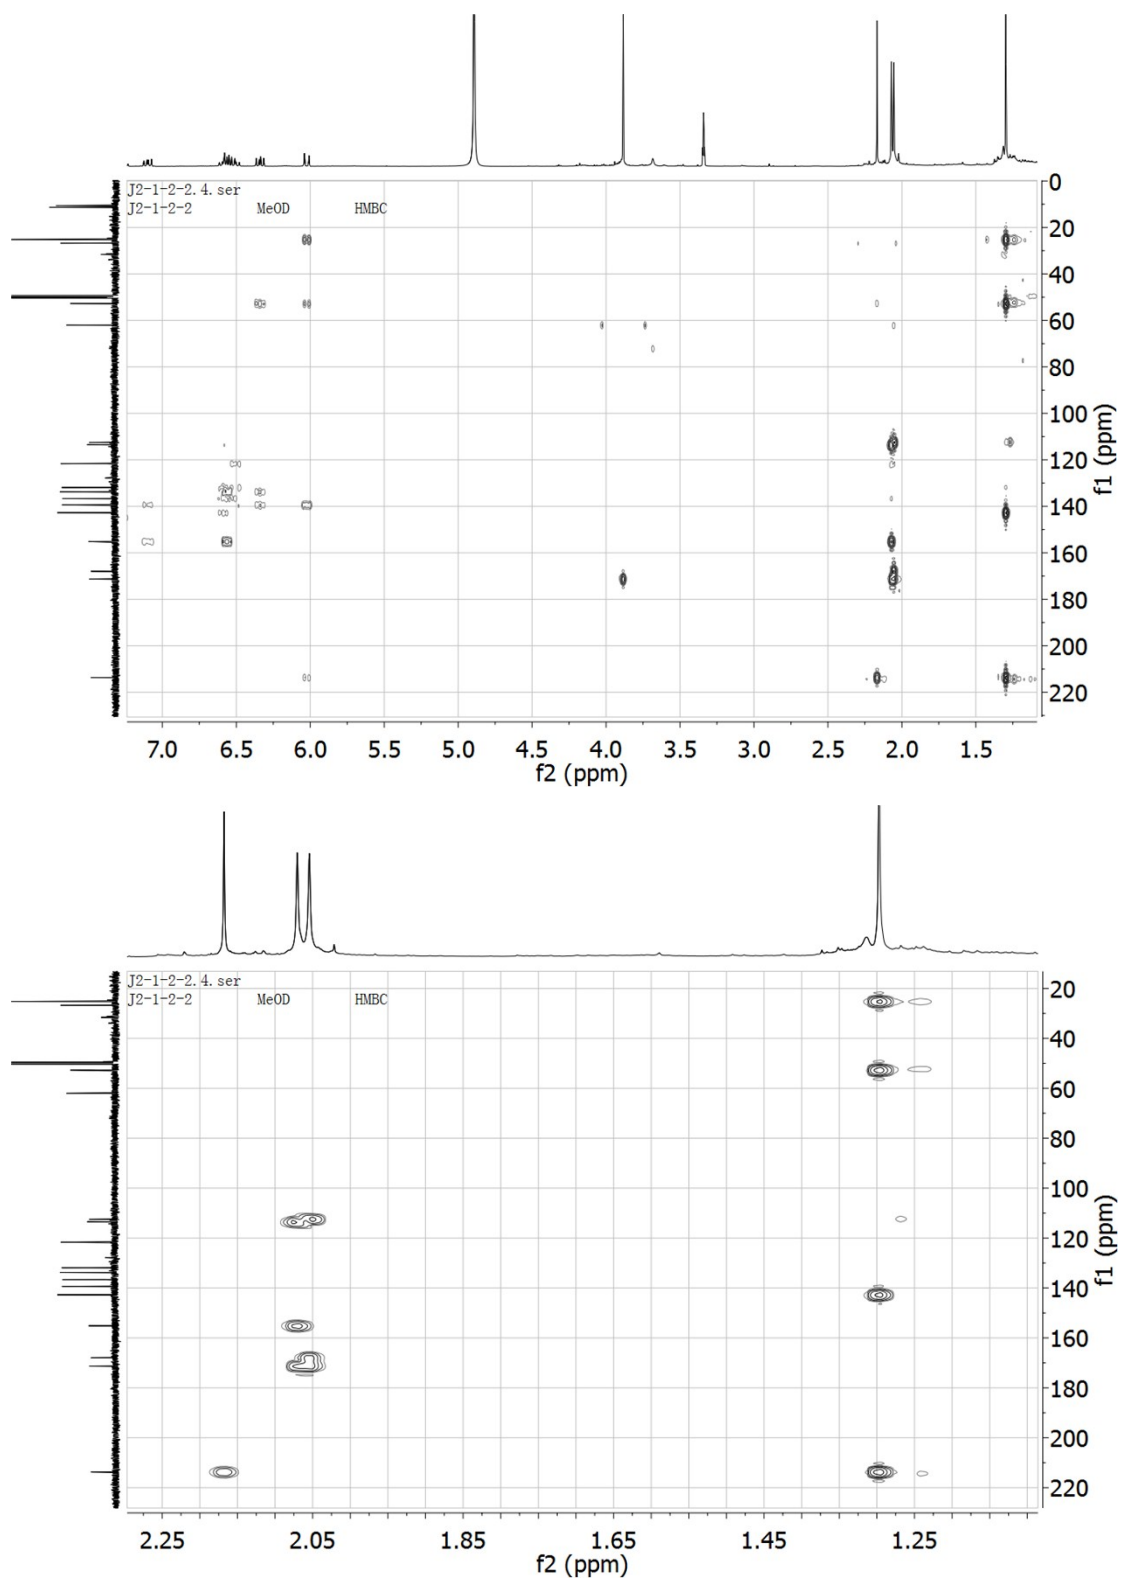

**Figure S10.** HMBC spectrum of compound **2** (500 MHz, CD<sub>3</sub>OD).

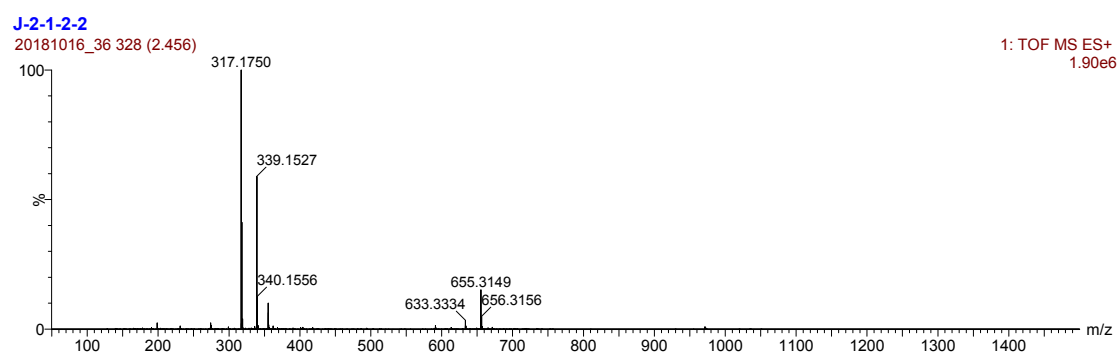

**Figure S11.** Positive ESI-HRMS spectrum of compound **2**.

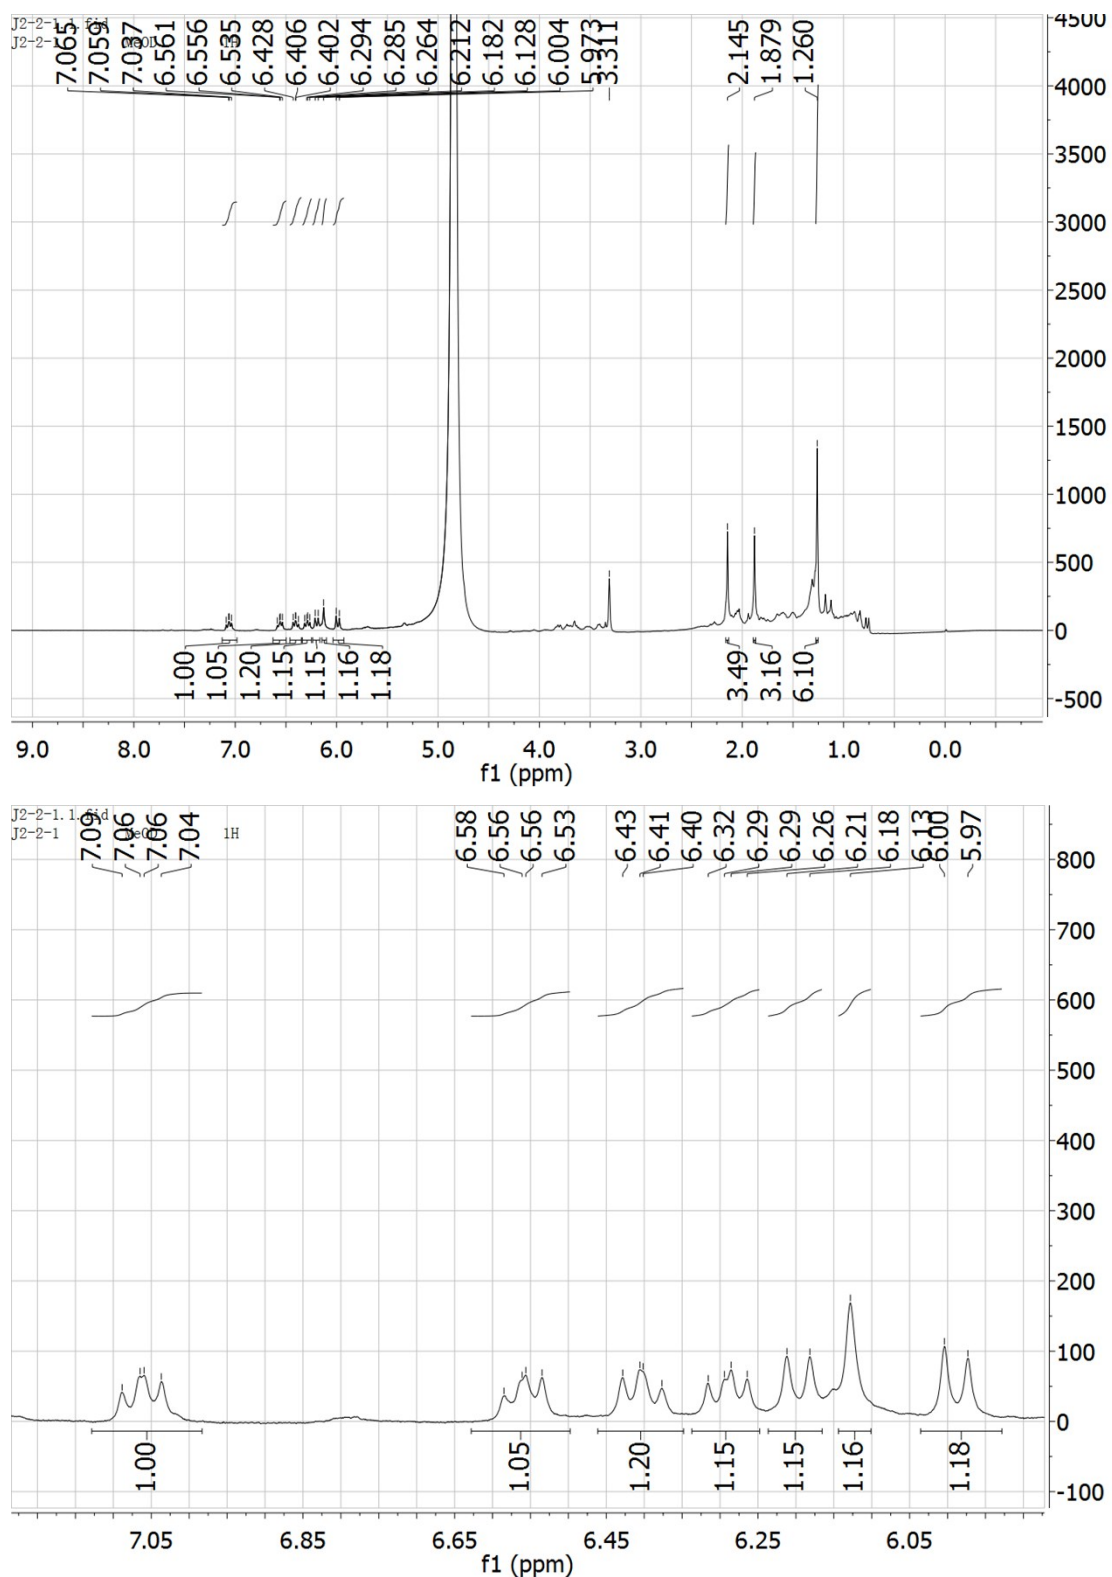

**Figure S12.**  $^1\text{H}$  NMR spectrum of compound **3** (500 MHz,  $\text{CD}_3\text{OD}$ ).

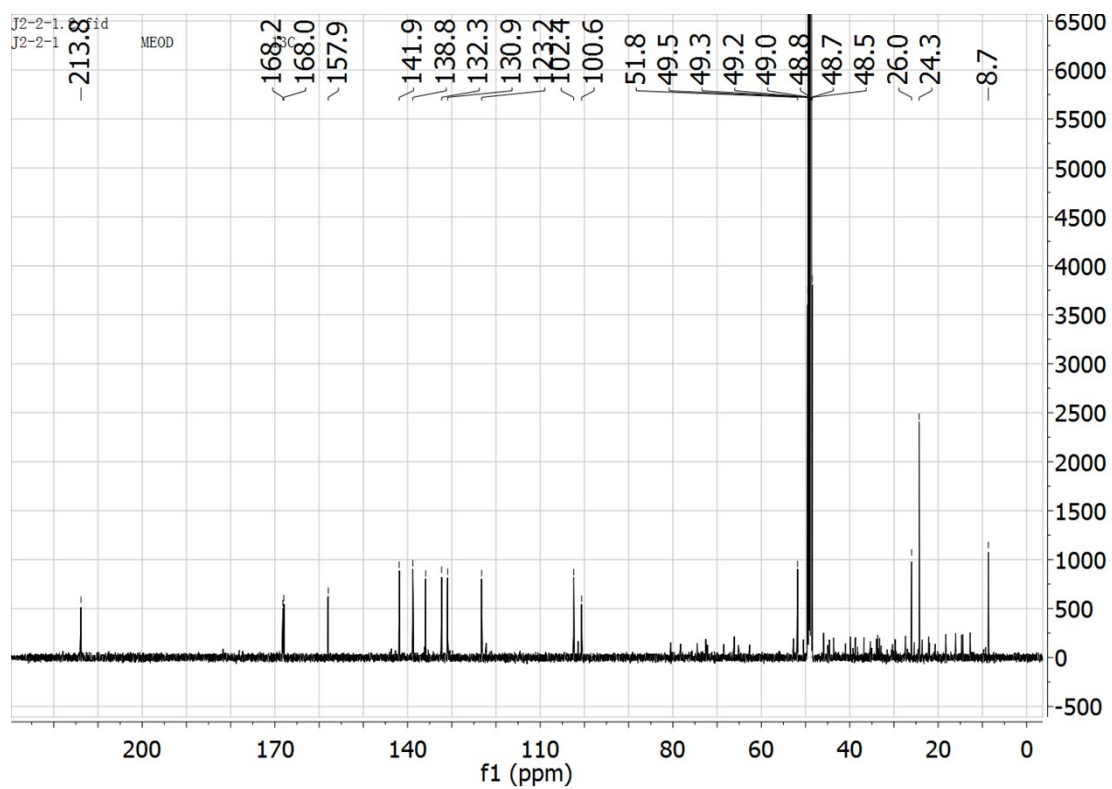

**Figure S13.** <sup>13</sup>C NMR spectrum of compound **3** (125 MHz, CD<sub>3</sub>OD).



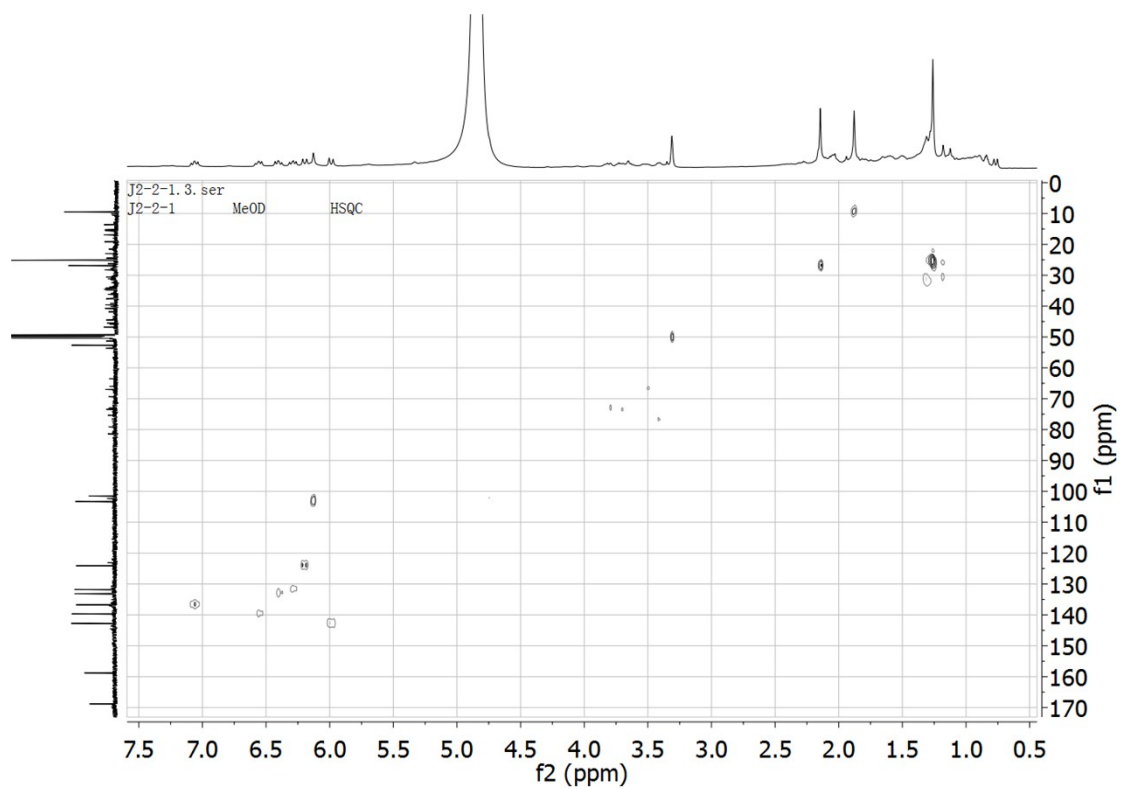

**Figure S14.** HSQC spectrum of compound **3** (500 MHz, CD<sub>3</sub>OD).

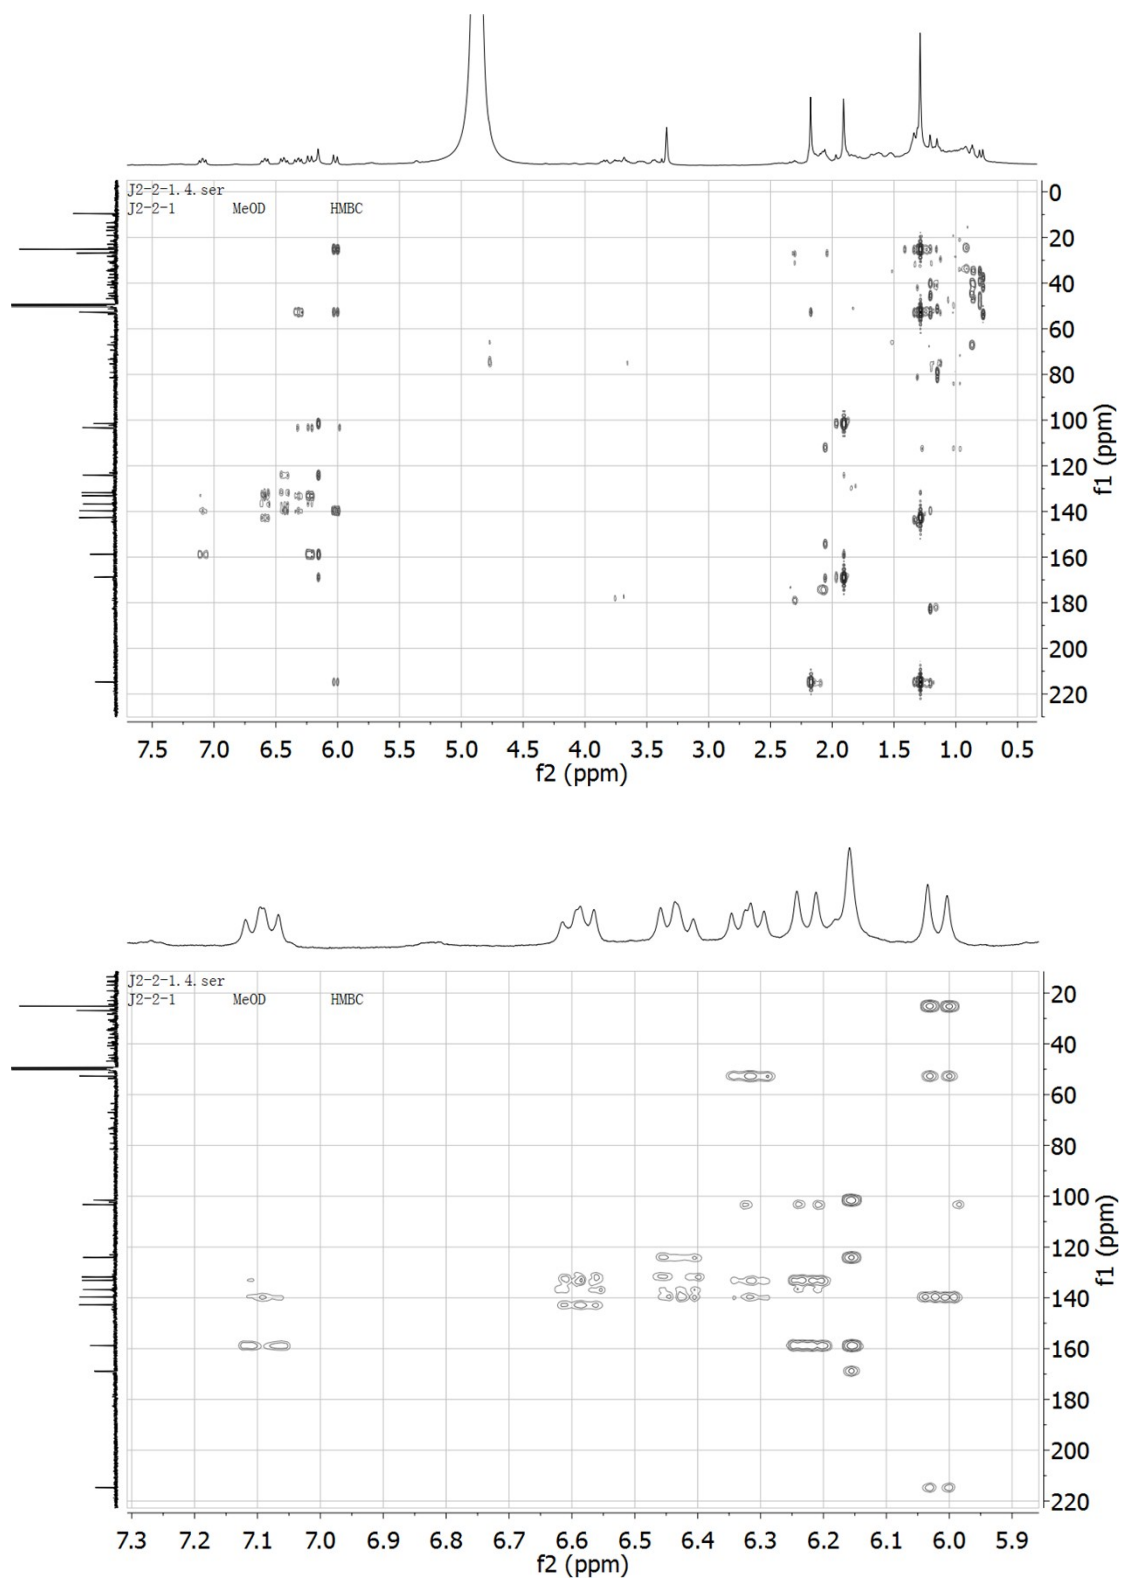

**Figure S15.** HMBC spectrum of compound **3** (500 MHz,  $\text{CD}_3\text{OD}$ ).

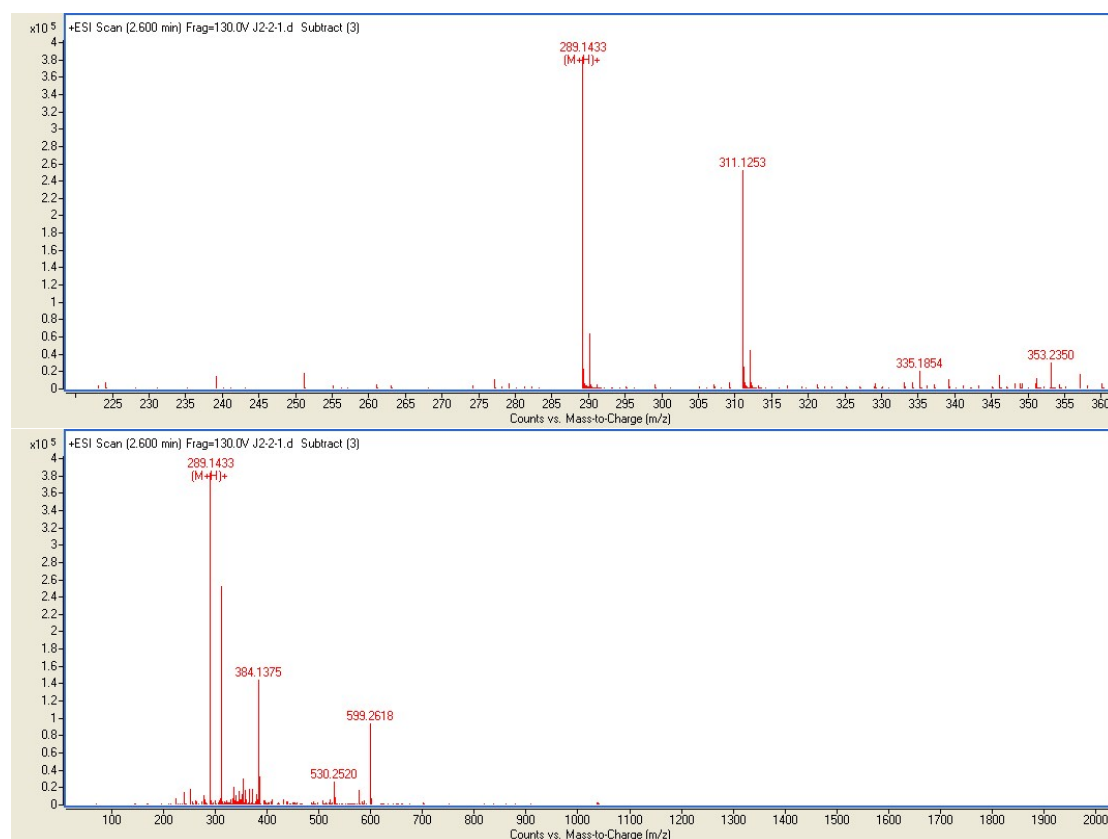

**Figure S16.** Positive ESI-HRMS spectrum of compound **3**.

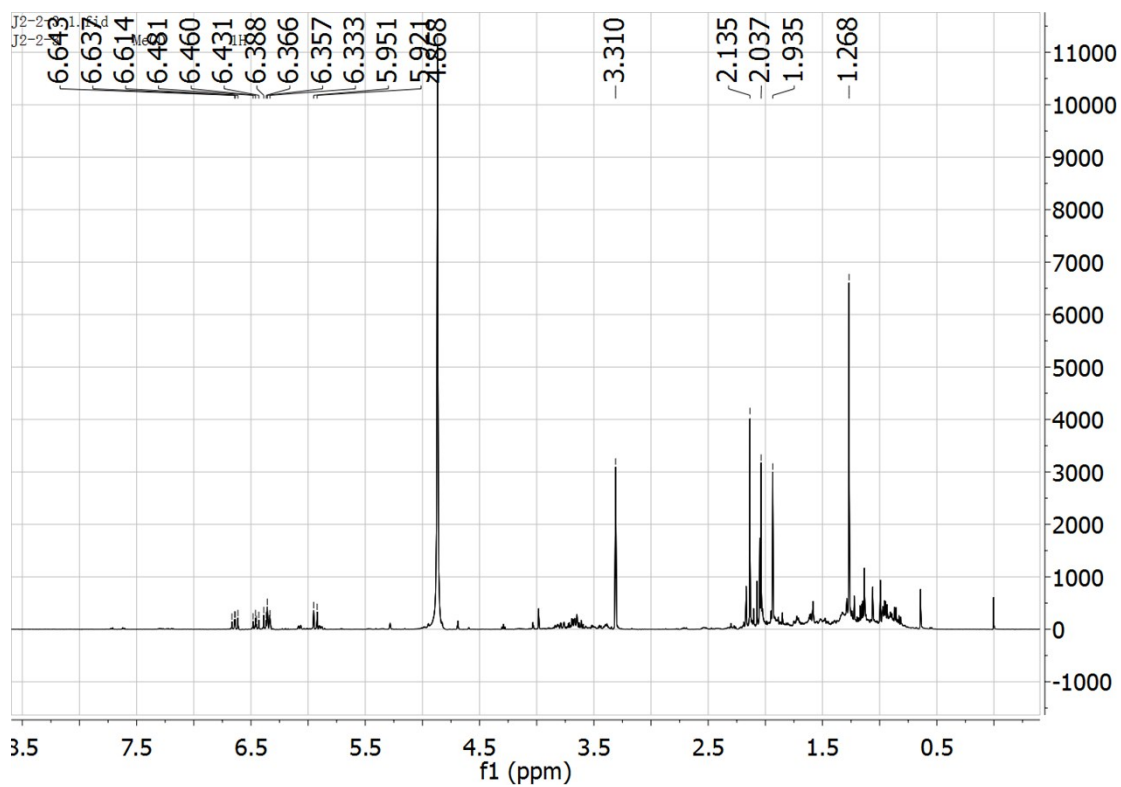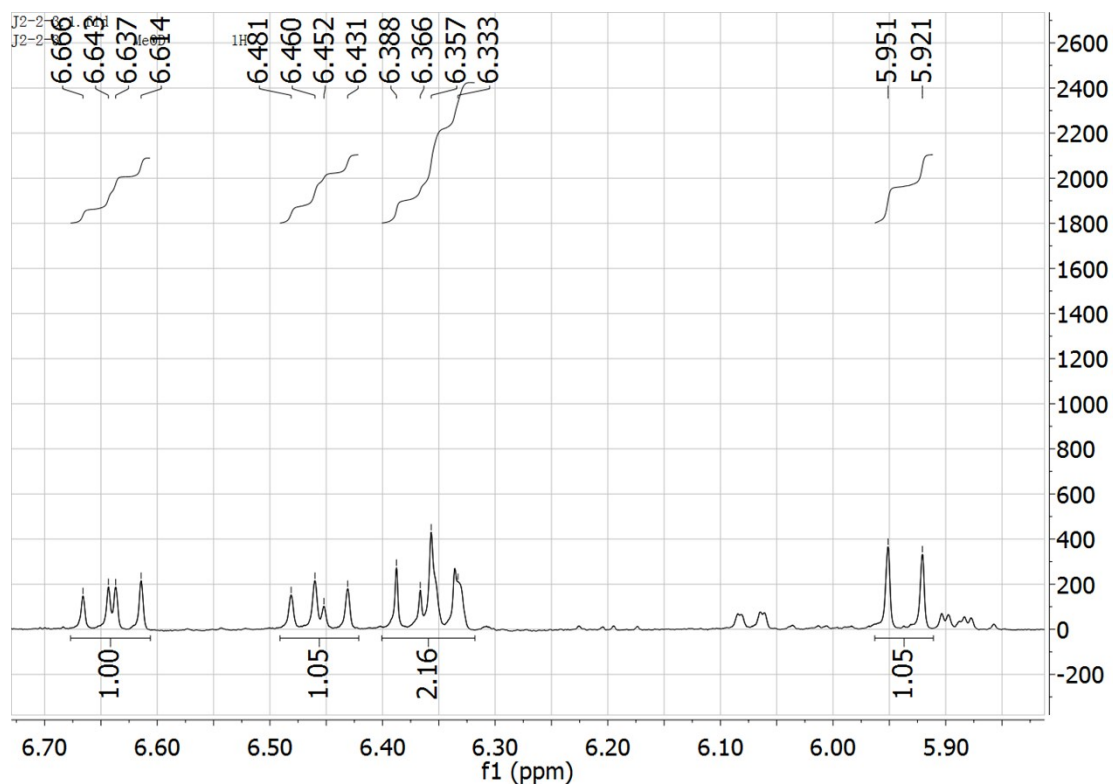

**Figure S17.** <sup>1</sup>H NMR spectrum of compound 4 (500 MHz, CD<sub>3</sub>OD).

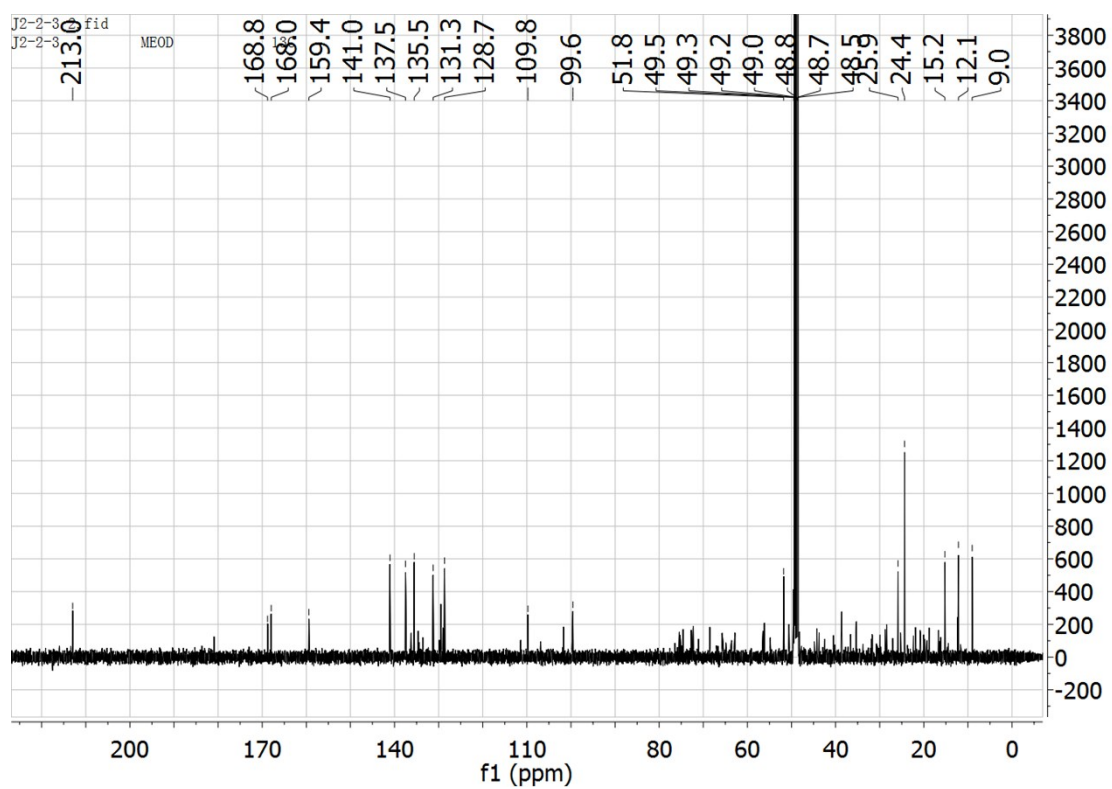

**Figure S18.** <sup>13</sup>C NMR spectrum of compound **4** (125 MHz, CD<sub>3</sub>OD).

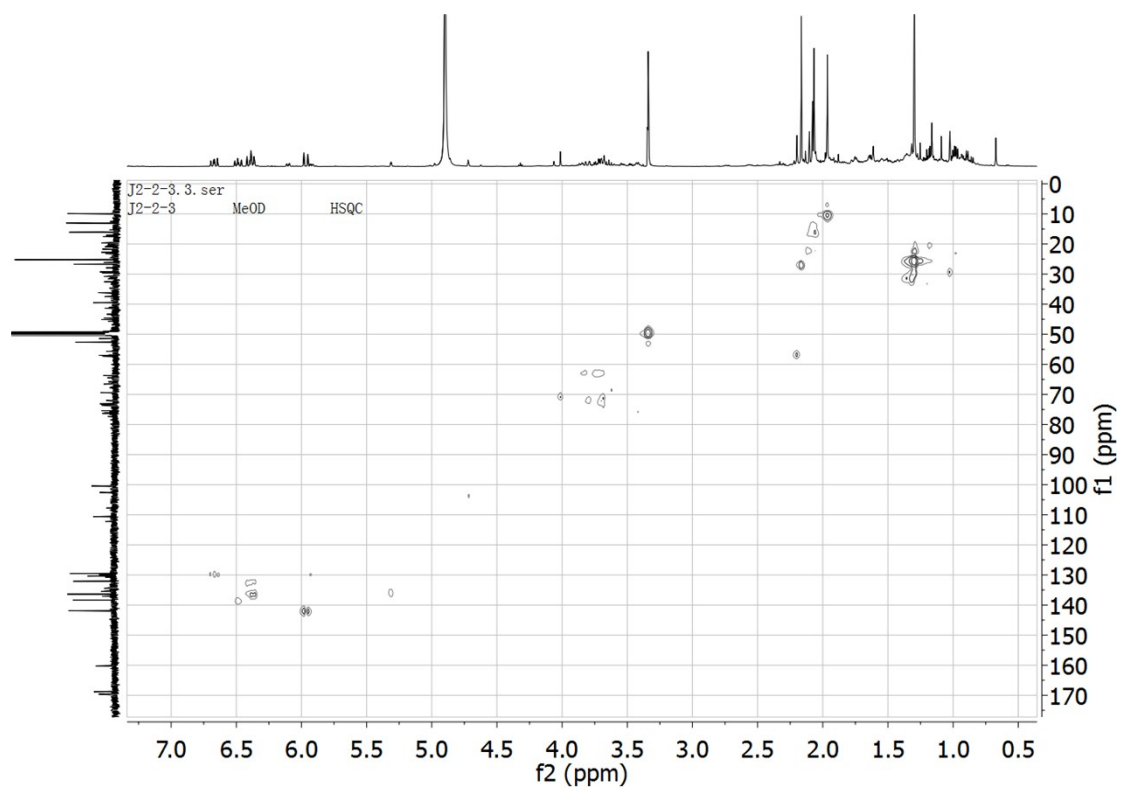

**Figure S19.** HSQC spectrum of compound **4** (500 MHz, CD<sub>3</sub>OD).

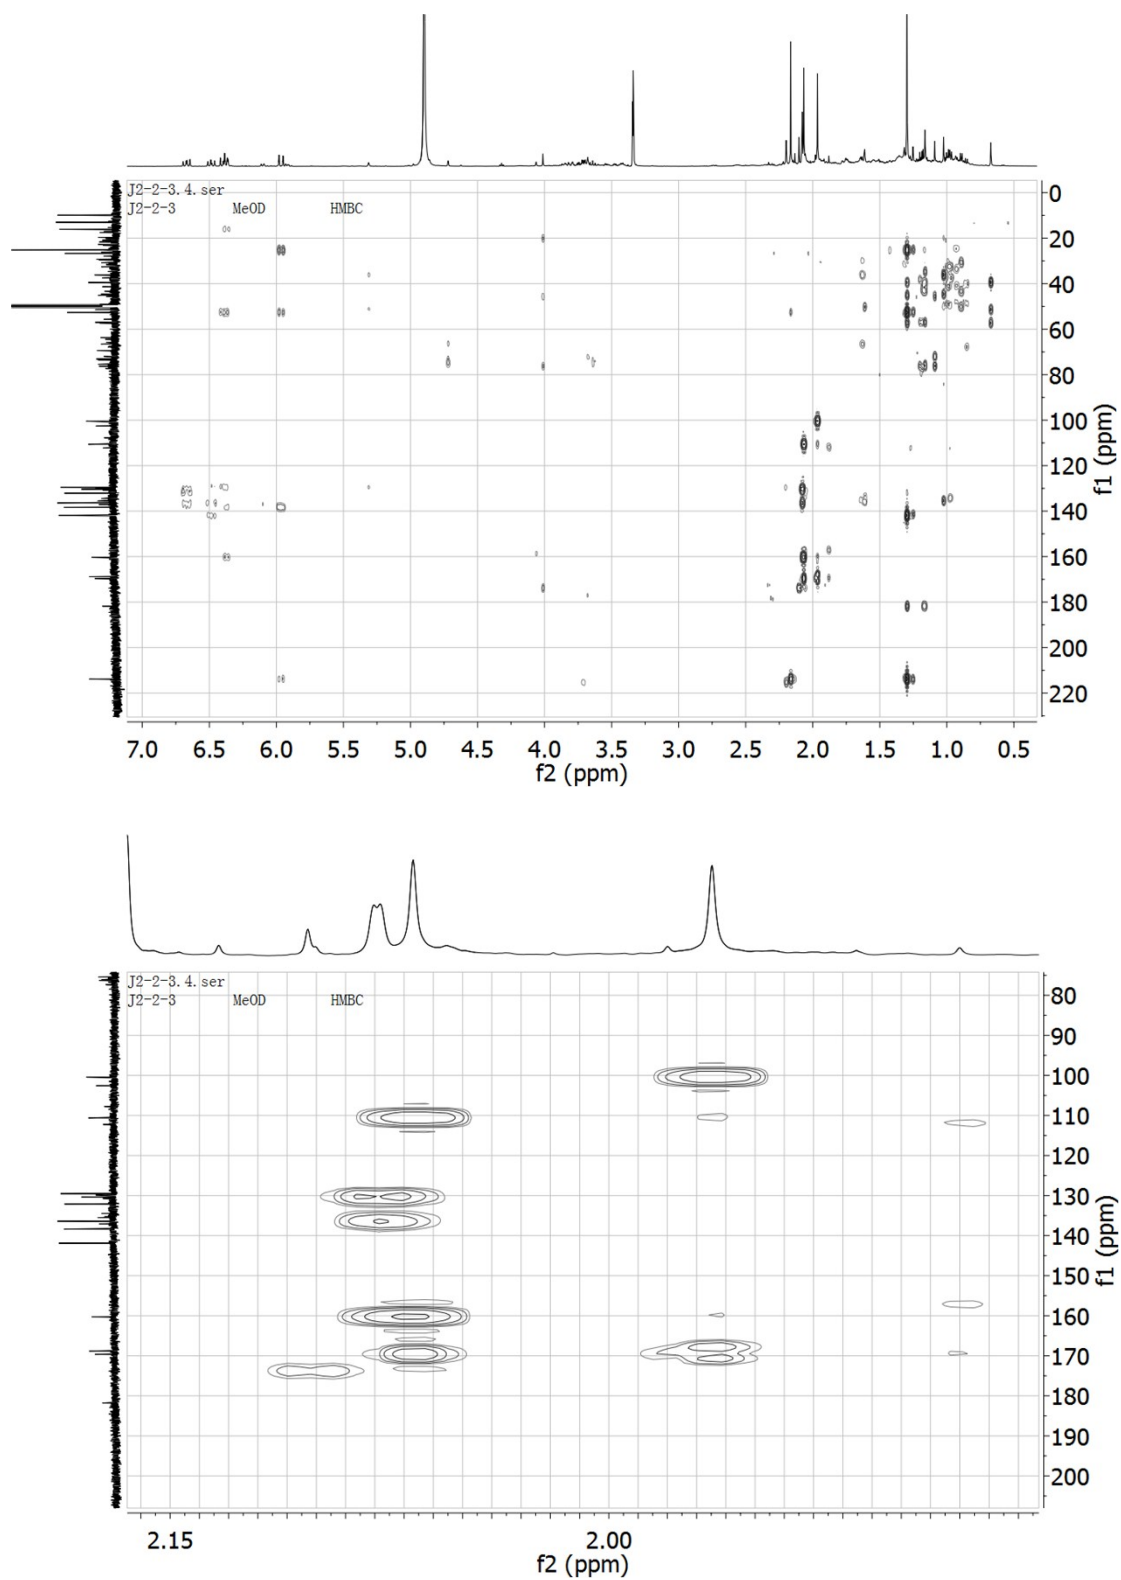

**Figure S20.** HMBC spectrum of compound **4** (500 MHz, CD<sub>3</sub>OD).

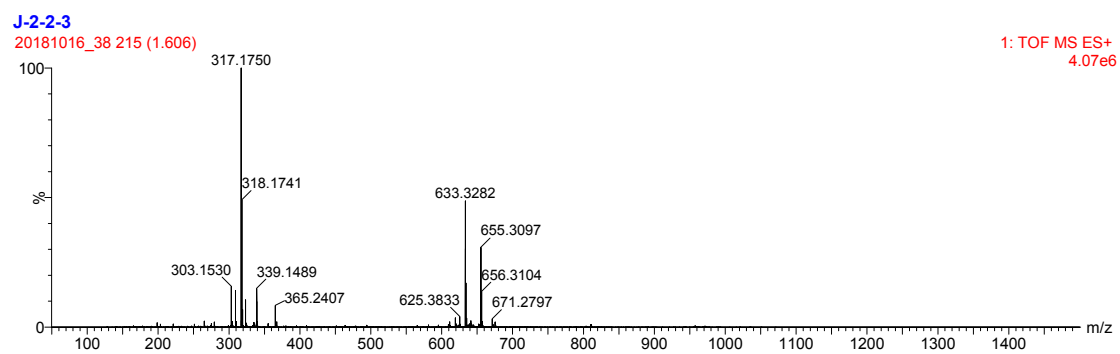

**Figure S21.** Positive ESI-HRMS spectrum of compound **4**.
